# Supplementary figures and images for: Synthesis, structure and properties of new bimetallic sodium and potassium lanthanum borohydrides
Source: Royal Society of Chemistry journal article supplement (doi:10.1039/c6dt03671f), 2016-01-01

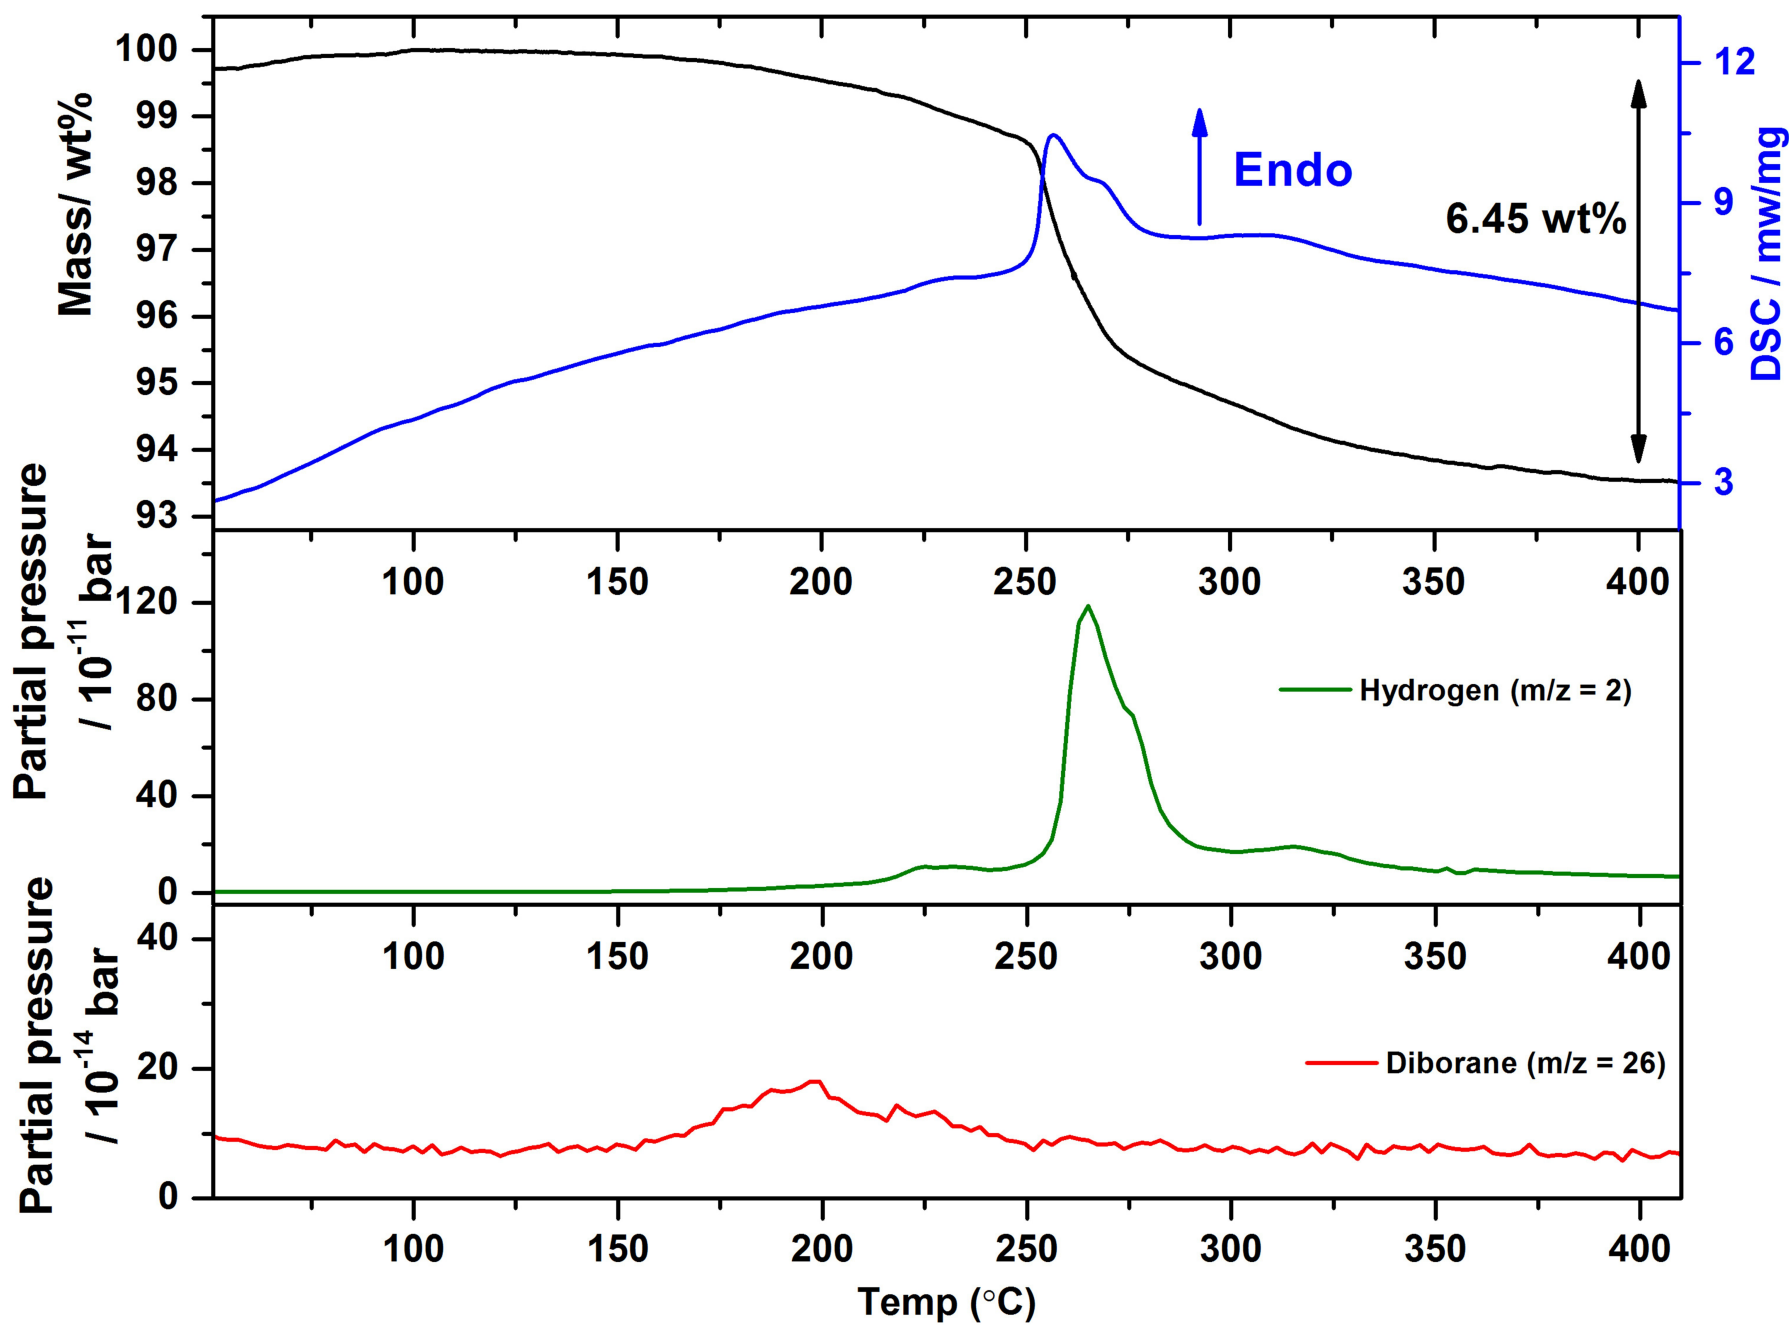

Supplement: c6dt03671f3.pdf [file c6dt03671f3.pdf]
